# Supplementary material for: Chloroplast Thylakoidal Ascorbate Peroxidase, PtotAPX, Has Enhanced Resistance to Oxidative Stress in Populus tomentosa
Source: MDPI journal article supplement (doi:10.3390/ijms23063340), 2022-03-19
Supplement: s1 [file s1]

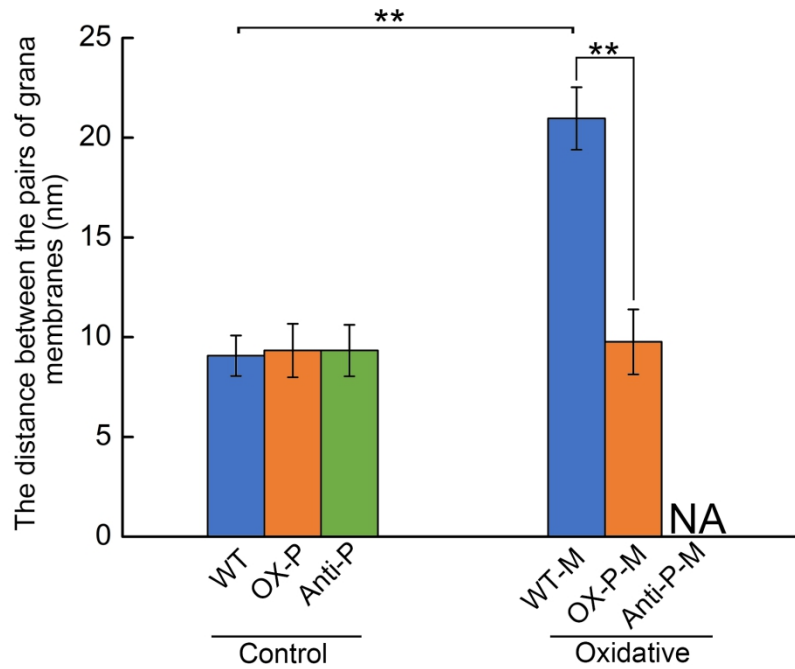

**Supplementary Figure 1. The distance between the pairs of grana membranes of wild-type and transgenic plants untreated or treated with 100  $\mu$ M MV.**

Micrographs of sections from 3 specimens were examined. Statistical differences were determined. Values are means  $\pm$  SD (n = 30). Significant differences between mean values are indicated by asterisks using Student's t-test. \*\* and \* indicate P < 0.01 and P < 0.05, respectively.

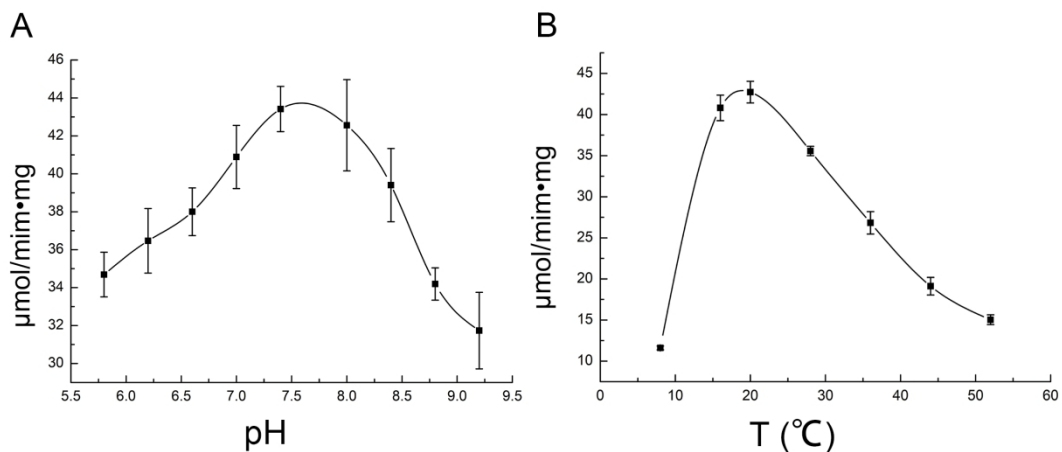

**Supplementary Figure 2. The optimal pH and temperature of PtotAPX.**

**Supplementary Table 1.** Sequences of primers used in this study.

| Primers              | Primer sequences (5'-3')      | Restriction sites |
|----------------------|-------------------------------|-------------------|
| <i>PtotAPX-F</i>     | ATGGCTTCTCTCAGTGGTGGTG        | N/A               |
| <i>PtotAPX-R</i>     | CTTCCAAGTTTTATATGTGATTTC      | N/A               |
| <i>P-PtotAPX-F</i>   | CGGGATCCTACTCTCCTTCCTCTCTCA   | <i>BamH</i> I     |
| <i>P-PtotAPX-R</i>   | CCCAAGCTTAACTTAATTTCCAAGAAGAG | <i>Hind</i> III   |
| <i>qRT-actin-F</i>   | AAACTGTAATGGTCCTCCCTCCG       | N/A               |
| <i>qRT-actin-R</i>   | GCATCATCACAATCACTCTCCGA       | N/A               |
| <i>qRT-PtotAPX-F</i> | CTGGAAAGAGAGAGTTGTCAG         | N/A               |
| <i>qRT-PtotAPX-R</i> | GTGCCAGAACAGCAATCAC           | N/A               |
