# Supplementary material for: Chloroplast Thylakoidal Ascorbate Peroxidase, PtotAPX, Has Enhanced Resistance to Oxidative Stress in Populus tomentosa
Source: MDPI journal article supplement (doi:10.3390/ijms23063340), 2022-03-19

Figure 1D

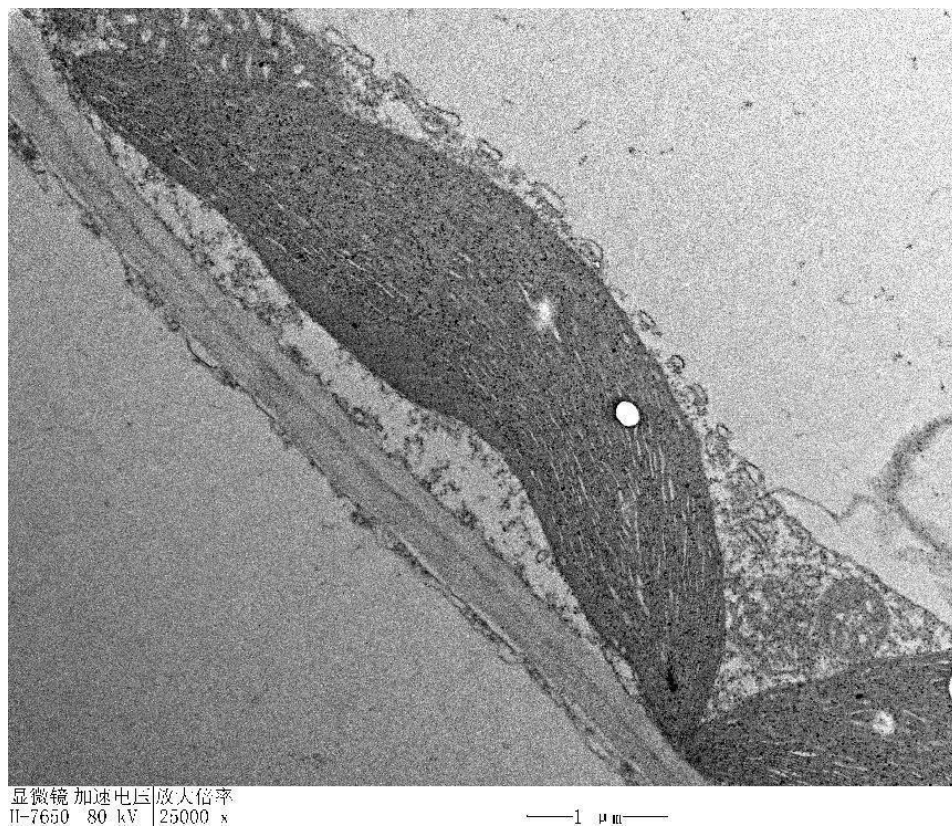

Figure 1E

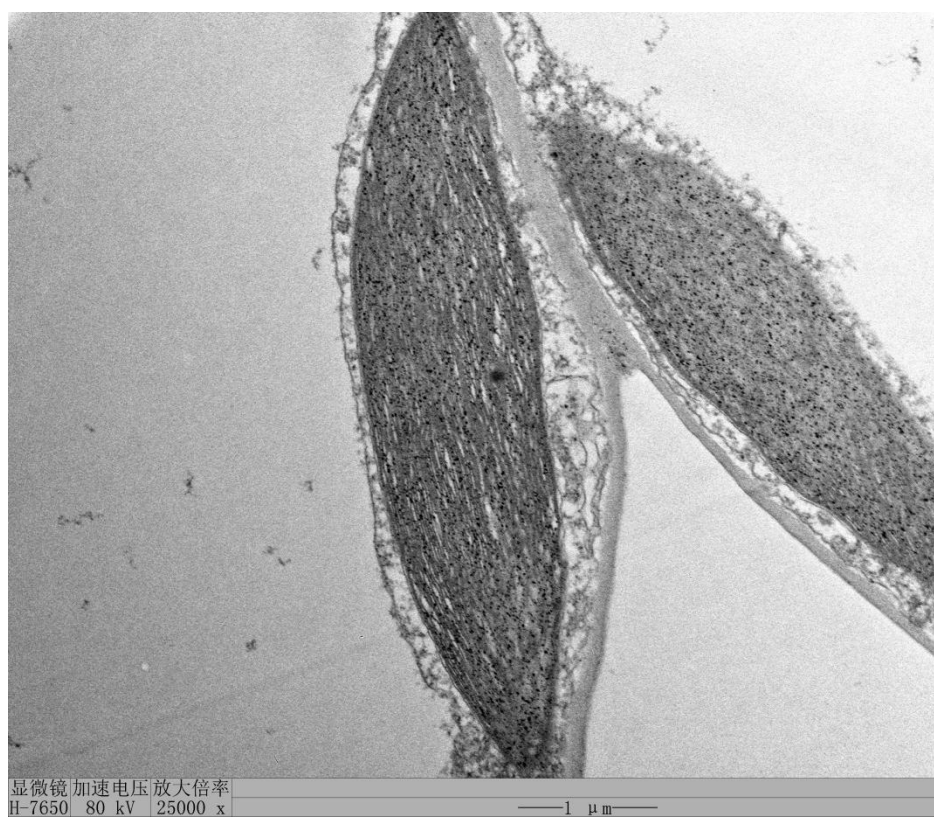

Figure 1F

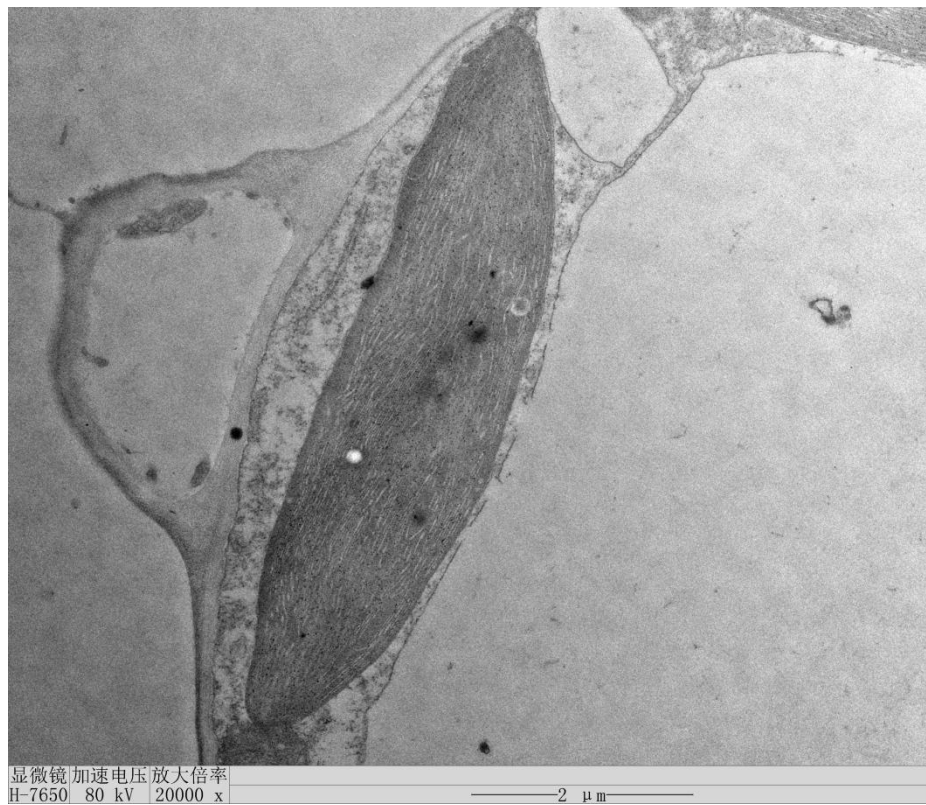

Figure 2A

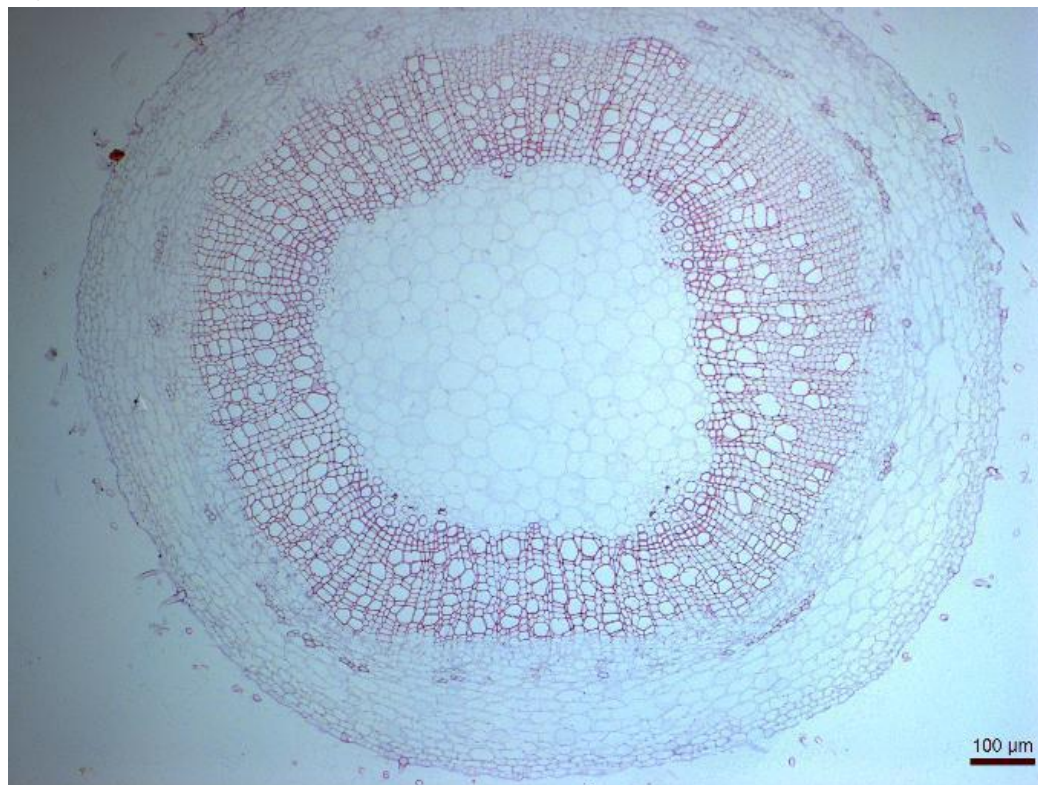



Figure 2B

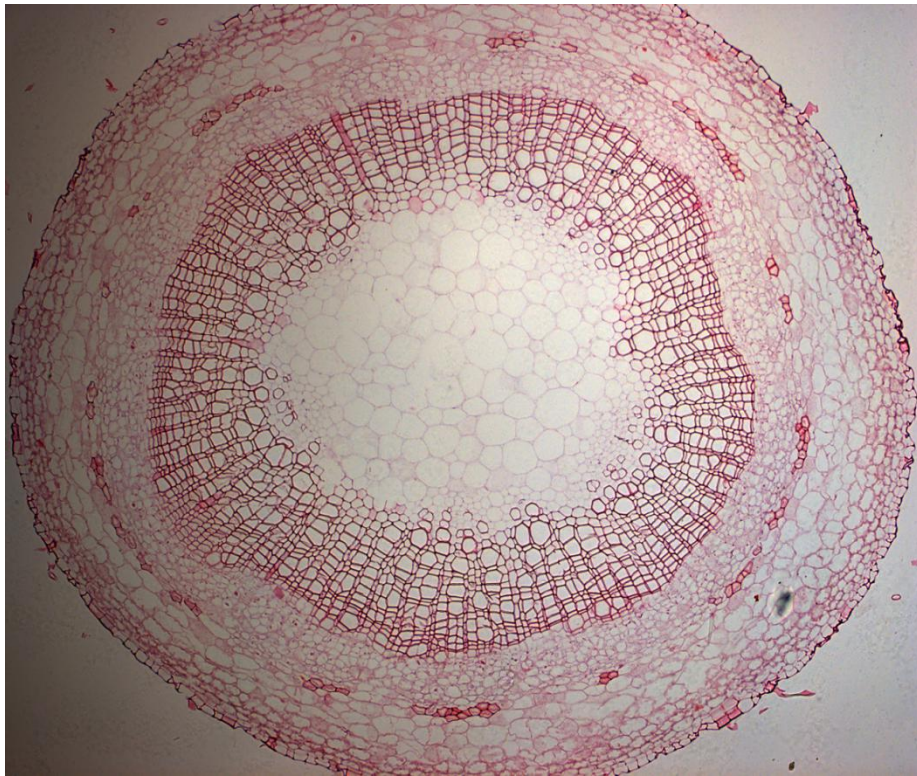

Figure 2C

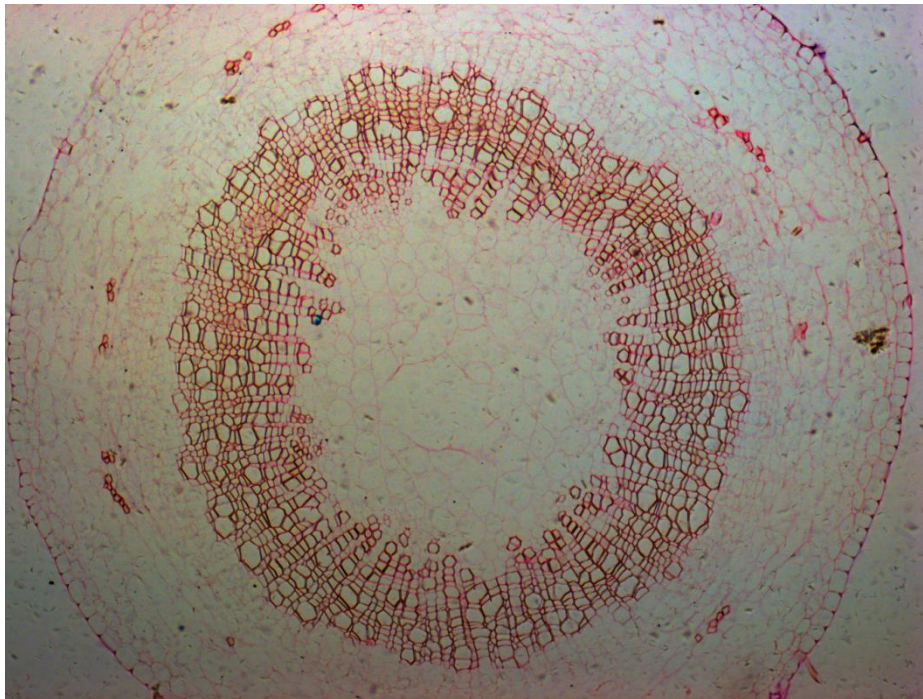

Figure 2D

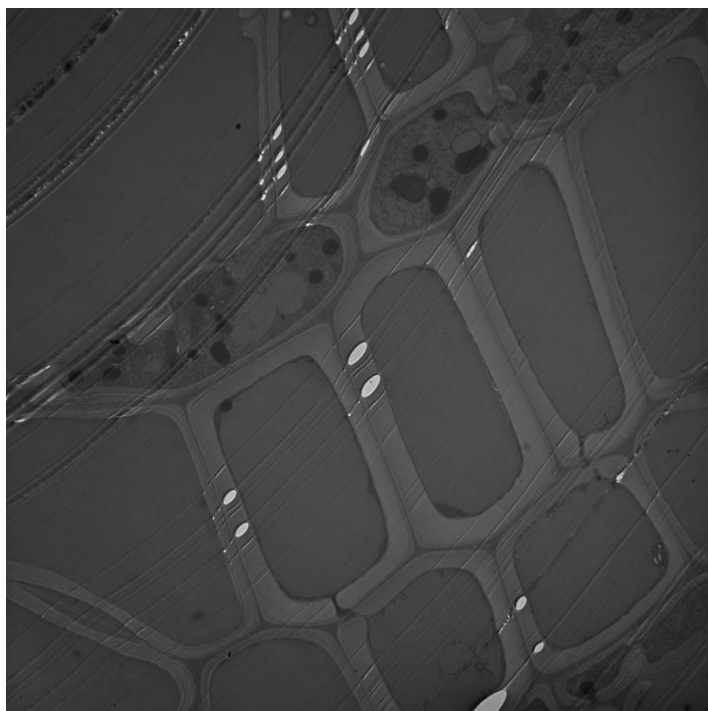

1-37.tif

Print Mag: 4750x @ 7.0 in

TEM Mode: Imaging

10  $\mu$ m

HV=79.0kV

Direct Mag: 4000x

Tilt:

AMT Camera System

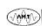

Figure 2E

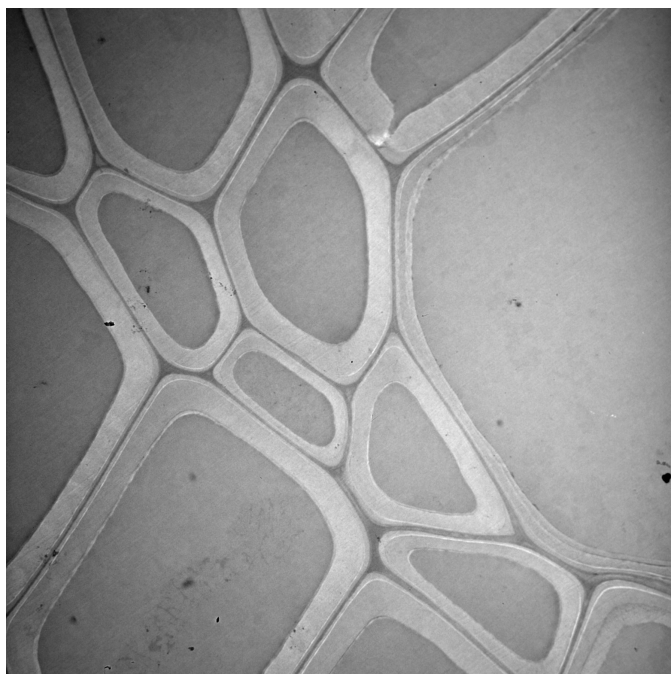

3-7.tif

Print Mag: 5940x @ 7.0 in

TEM Mode: Imaging

2  $\mu$ m

HV=79.0kV

Direct Mag: 5000x

Tilt:

AMT Camera System

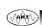

Figure 2F

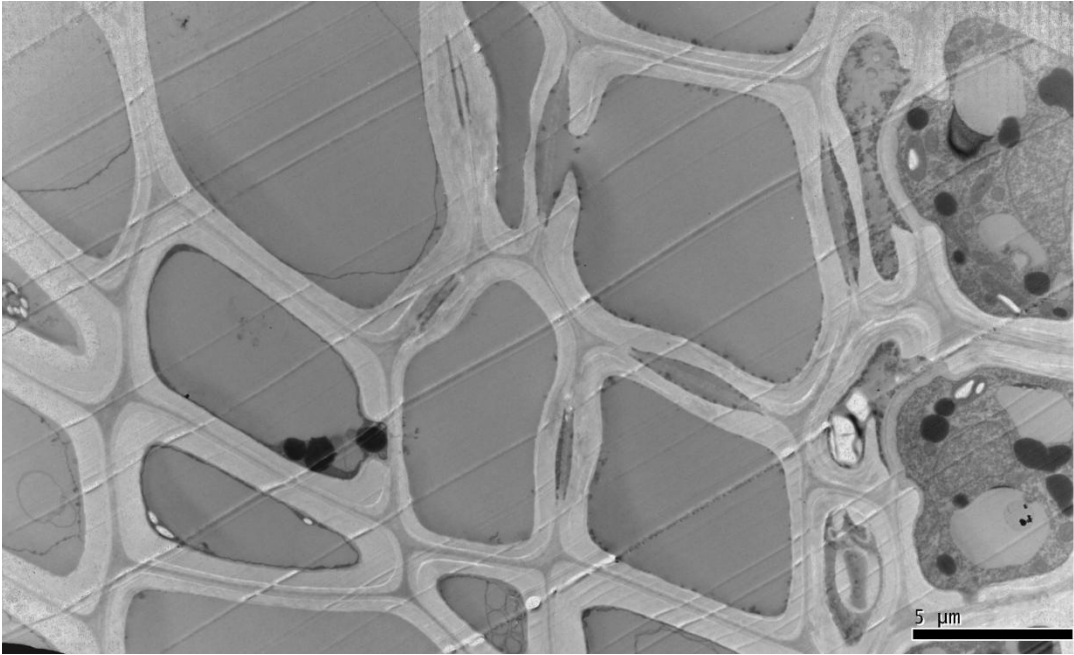

Figure 3D

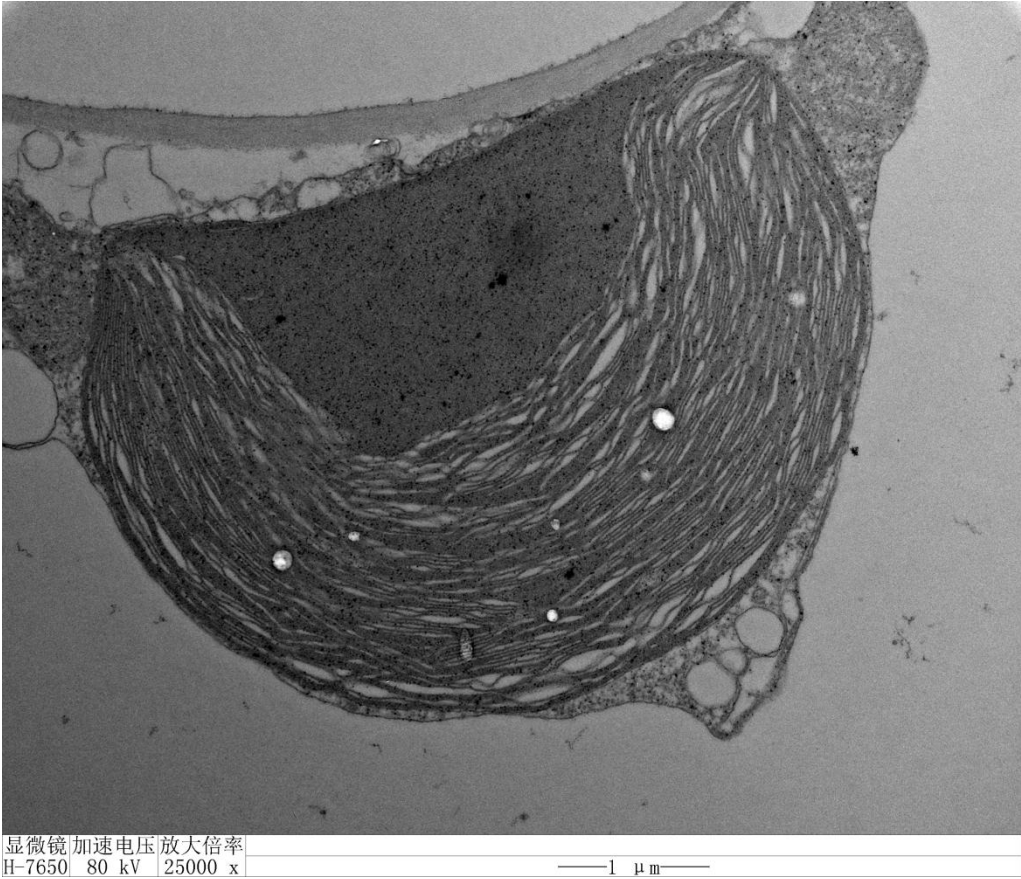



Figure 3E

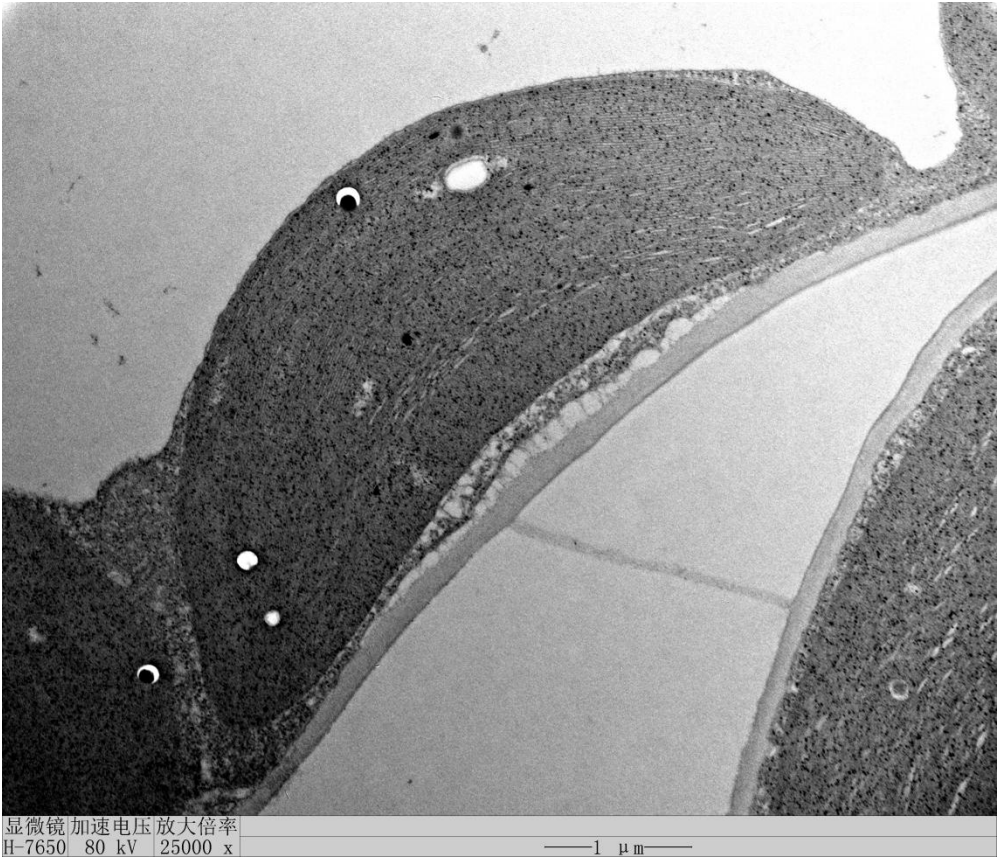

Figure 3F

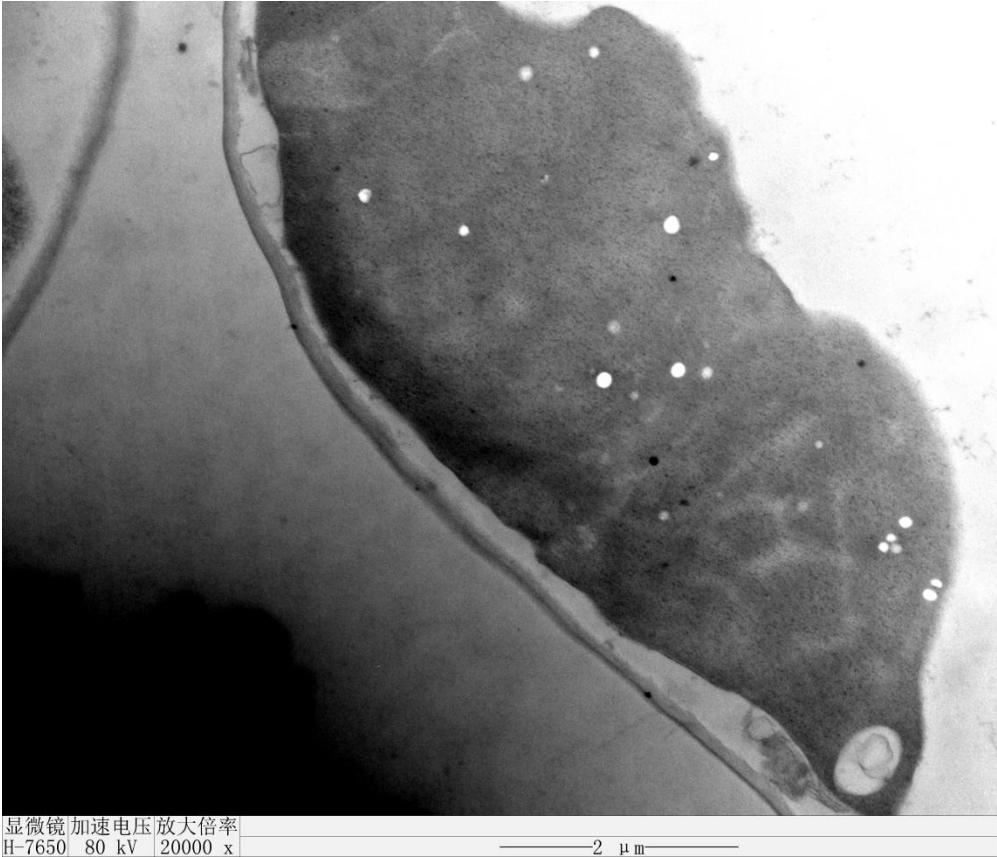

Supplement: s1 [file s1]
